# Supplementary material for: Regulating the starting location of front-gradient enabled highly efficient Cu(In,Ga)Se2 solar cells via a facile thiol–amine solution approach
Source: Royal Society of Chemistry journal article supplement (doi:10.1039/c7ta10889c), 2018-01-01
Supplement: c7ta10889c1.pdf [file c7ta10889c1.pdf]

## Supplementary Information

### **Regulating the Starting Location of Front-Gradient Enabled Highly Efficient Cu(In,Ga)Se<sub>2</sub> Solar Cells Via a Facile Thiol–Amine Solution Approach**

Qingmiao Fan,<sup>ab</sup> Qingwen Tian,<sup>\*ab</sup> Houlin Wang,<sup>ab</sup> Fengming Zhao,<sup>ab</sup> Jun Kong,<sup>ab</sup> and Sixin Wu<sup>\*ab</sup>

<sup>a</sup>The Key Laboratory for Special Functional Materials of MOE, Henan University, Kaifeng, 475004, China.

<sup>b</sup>Collaborative Innovation Center of Nano Functional Materials and Applications, Henan University, Kaifeng 475004, Henan, China

E-mail: tianqw@henu.edu.cn; wusixin@henu.edu.cn.

## Experimental

### Materials

Copper (I) sulfide ( $\text{Cu}_2\text{S}$ , 99.5%), indium (III) selenide ( $\text{In}_2\text{Se}_3$ , 99.99%), 1, 2- ethanedithiol ( $\text{HSCH}_2\text{CH}_2\text{SH}$ , > 98%), and 1, 2- ethylenediamine ( $\text{H}_2\text{NCH}_2\text{CH}_2\text{NH}_2$ , 99%) were purchased from Alfa Aesar chemical company. Gallium pellets (Ga 99.9999%), selenium (Se, 99.9%), cadmium sulfate ( $\text{CdSO}_4 \cdot 8/3\text{H}_2\text{O}$ , 99%), and thiourea ( $\text{NH}_2\text{CSNH}_2$ , 99%) were purchased from Aladdin company. Hydrobromic acid (HBr, 40%, Aladdin) were purchased from Sinopharm Chemical Reagent Co., Ltd. Ammonium hydroxide ( $\text{NH}_4\text{OH}$ , 25%) was obtained from Xilong Scientific Company.

### Preparation of four precursor solutions with different Ga ratios

We prepared four different Ga ratios precursor solutions [ $\text{Ga}/(\text{In}+\text{Ga}) = 10\%$ , 30%, 35%, and 50%] to investigate the influence of different Ga gradients on the performance of solar cells. First, 0.5 mmol of  $\text{Cu}_2\text{S}$ , 2.20 mmol of Se,  $x$  mmol of Ga, and  $(1.09 - x)/2$  mmol of  $\text{In}_2\text{Se}_3$  were added to four 25ml round-bottom flasks. (The detailed amounts of Ga and  $\text{In}_2\text{Se}_3$  are listed in Table S4.) Then, 3.7 mL of 1, 2 - ethylenediamine and 0.37 mL of 1, 2 - ethanedithiol were mixed into each of the four round-bottom flasks. Then, the four solutions were magnetically stirred at 70 °C for 24 h until all of the solids were dissolved. The ratio of the starting materials follows the target of Cu-poor stoichiometry [ $\text{Cu}/(\text{In}+\text{Ga}) = 0.92$  and  $\text{Ga}/(\text{In}+\text{Ga}) = 0.10, 0.30, 0.35, \text{ and } 0.50$ ]. Digital photographs of the four CIGSe precursor solutions are shown in Fig. S1. All of the solution preparation processes were performed in an argon-filled glovebox ( $\text{H}_2\text{O}$  and  $\text{O}_2$  levels maintained below 1 ppm).

### Deposition and selenization of the CIGSe films with different Ga gradients

First, ~ 650 nm thick molybdenum (Mo) back contacts were deposited on a  $20 \times 20 \times 1.0 \text{ mm}^3$  soda lime glass *via* DC sputtering (square resistance: 0.3- 0.6  $\Omega/\square$ ). Then, the prepared CIGSe precursor solutions that had different Ga ratios (Table S4) were spin coated onto Mo-coated soda lime glasses (SLG) at 3000 rpm for 30 s, followed by sintering on a 350 °C hot plate for 2 min. The spin-coating/sintering operations described above were repeated according to the schematic description in Fig. 1 and until the precursor film had a targeted thickness (~ 1.74  $\mu\text{m}$ ). For each spin-coating/sintering cycle the homogeneous absorber layer was prepared using the same precursor solutions, and the Ga-graded CIGSe absorber layer was prepared using different precursor solution. For example, a typical CIGSe absorber layer for sample C can be deposited by repeating 2 cycles of  $\text{Cu}(\text{In}_{0.50}\text{Ga}_{0.50})\text{Se}_2$  (~ 294 nm) solution deposition, 4 cycles of  $\text{Cu}(\text{In}_{0.65}\text{Ga}_{0.35})\text{Se}_2$  (~580 nm), 4 cycles of  $\text{Cu}(\text{In}_{0.90}\text{Ga}_{0.10})\text{Se}_2$  (~ 483 nm), and finally 2 cycles of  $\text{Cu}(\text{In}_{0.65}\text{Ga}_{0.35})\text{Se}_2$  (~390 nm). The above preparation procedures were performed in an argon-filled glovebox. Finally, the as-prepared CIGSe thin films that had different Ga gradients were selenized in a round graphite box containing 400 mg of selenium (Se, 99.9%) at 550 °C for 15 min in a rapid thermal processing (RTP) furnace (MTI, OTF-1200X-4-RTP, ramp to 550 °C at 8.7 °C  $\text{s}^{-1}$ ) with a nitrogen flow of 80 mL  $\text{min}^{-1}$ .

### Fabrication of CIGSe Thin Film Solar Cells with different Ga gradients

To fabricate photovoltaic devices, CIGSe thin film solar cells with different Ga gradients were fabricated according to the following well-known device structure: Ag/ITO/i-ZnO/CdS/CIGSe/Mo/glass. First, a ~ 70 nm thick cadmium sulfide (CdS) layer was deposited by a chemical bath approach. 12.0 mL of Ammonium hydroxide, 50 mL of cadmium sulfate (0.006 M), and 50 mL of thiourea (0.03 M), and 150 mL of deionized  $\text{H}_2\text{O}$  were mixed in a 65 °C water bath for 13 min.<sup>1,2,3</sup> Next, about 50 nm thick i-ZnO (100 W, 0.4 Pa Ar, 5 min) and 200 nm thick ITO layers (90 W, 0.5 Pa Ar, 5 min) were deposited on CdS/CIGSe/Mo/glass layer using magnetron sputtering. Then, 80 nm thick Ag top electrodes were made on the top of the devices using thermal evaporation (thermal evaporation current of 12 A, evaporation time of 2 min). Finally, all CIGSe devices with different Ga gradients owning an active area of 0.21  $\text{cm}^2$  (~ 91% of the total device area, 0.23  $\text{cm}^2$ ) were separated by mechanical scribing. The digital photographs of the final devices that had different Ga gradients were shown in Fig. S1. No antireflection layer was used in our devices.

### Characterizations

The X-ray diffraction (XRD) patterns were taken with a Bruker D8Advance X-ray diffractometer. The scanning electron microscope (SEM) images were collected using a Nova Nano SEM 450 field emission scanning electron microscope (FESEM). Photocurrent density-voltage curves were recorded under the standard AM1.5 illumination (100  $\text{mW cm}^{-2}$ ) with a Keithley 2400 source meter. The external quantum efficiency (EQE) spectrum was measured using a Zolix SCS100 QE system equipped with a 150-W xenon light source and a lock-in amplifier. The overall composition of each type of ion is measured by Inductively Coupled Plasma-Atomic Emission Spectrometry (ICP-AES) using Optima 2100DV with spectral region of 165~782nm. The C-V characterizations curves were measured by Deep Level Transient Spectroscopy (HERA-DLTS) system produced by Phys Tech. The

depth composition measurements is obtained by Secondary ion mass spectrometry (SIMS) using CAMECA, IMS 7f-Auto and was proved by an energy dispersive X-ray (EDX-line scan) analyzed by Nova Nano SEM 45050/EDAX.

### Supporting figures and tables

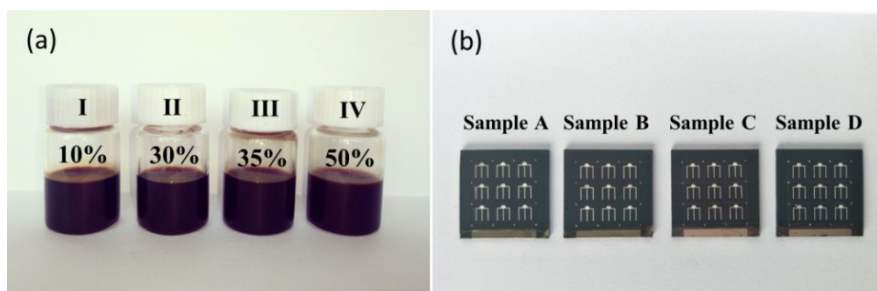

**Figure S1.** (a) Digital photographs of the four  $\text{Cu}(\text{In,Ga})\text{Se}_2$  precursor solutions with different Ga ratios. (b)  $\text{Cu}(\text{In,Ga})\text{Se}_2$  solar cells with different Ga gradients.

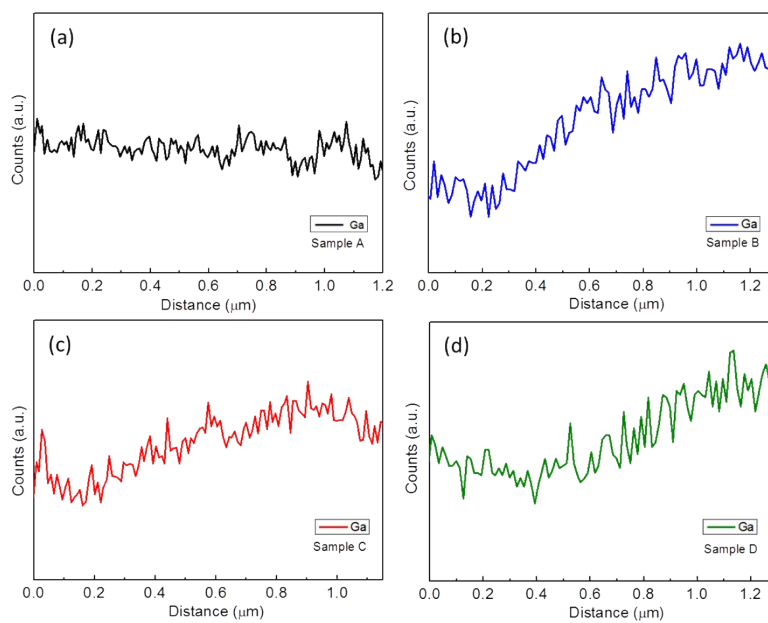

**Figure S2.** EDS elemental Ga line scan of the  $\text{Cu}(\text{In,Ga})\text{Se}_2$  selenized films that had different Ga gradients.

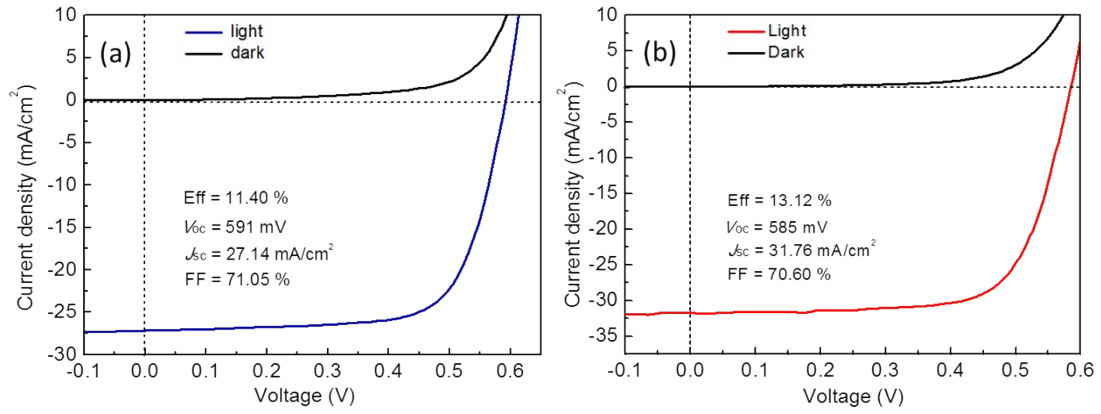

**Figure S3.**  $J$ - $V$  curves of (a) the best homogeneous  $\text{Cu}(\text{In,Ga})\text{Se}_2$  solar cell and (b) the best graded  $\text{Cu}(\text{In,Ga})\text{Se}_2$  solar cell under AM 1.5G illumination.

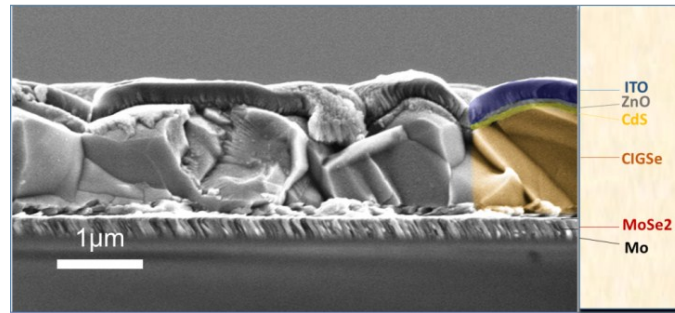

**Figure S4.** Cross-sectional SEM image of the champion  $\text{Cu}(\text{In,Ga})\text{Se}_2$  solar cell.

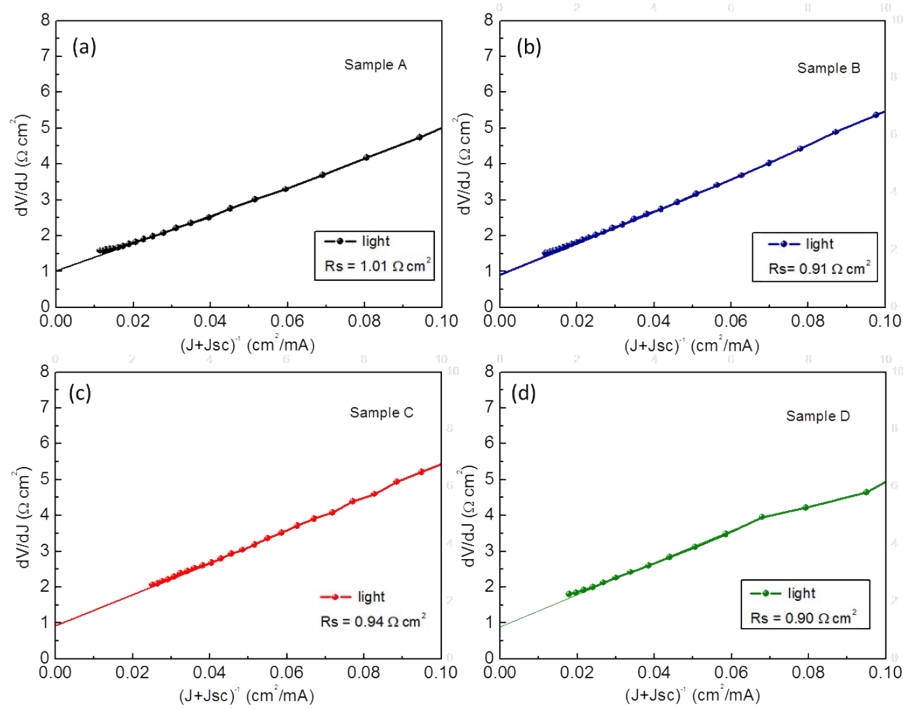

**Figure S5.** Plots of  $dV/dJ$  vs  $(J+J_{sc})^{-1}$  redrawn from the standard light  $J$ - $V$  curves of the  $\text{Cu}(\text{In,Ga})\text{Se}_2$  solar cells that had different Ga gradients.

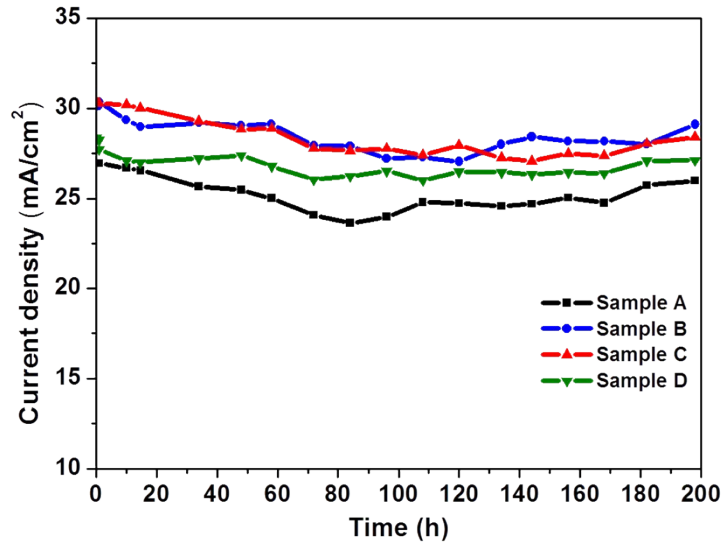

**Figure S6.** Stability of the current-density curves for Cu(In,Ga)Se<sub>2</sub> solar cells stored in air for 200 hours.

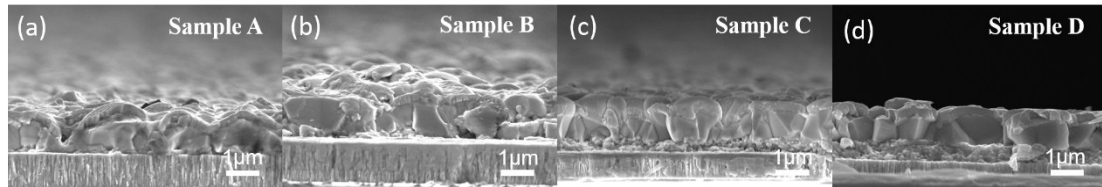

**Figure S7.** SEM images of the Cu(In,Ga)Se<sub>2</sub> solar cells with different Ga gradients after I-T test.

**Table S1.** Thickness of Stages 1-4 in Fabricating Cu(In,Ga)Se<sub>2</sub> Absorber Layers that had Different Ga Gradients.

| Sample | Stage- 1 (nm) | Stage- 2 (nm) | Stage- 3 (nm) | Stage- 4 (nm) | Total (nm) |
|--------|---------------|---------------|---------------|---------------|------------|
| A      | 1730          | ---           | ---           | ---           | 1730       |
| B      | 310           | 783           | 480           | 185           | 1758       |
| C      | 294           | 580           | 483           | 390           | 1747       |
| D      | 312           | 376           | 492           | 570           | 1750       |

**Table S2.** Summary of ICP-AES Results for the Cu(In,Ga)Se<sub>2</sub> Solar Cells that had Different Ga Gradients.

| ICP-AES  | Cu/(Ga+In) | Ga/(Ga+In) | Cu (%) | In (%) | Ga (%) | Se (%) |
|----------|------------|------------|--------|--------|--------|--------|
| Sample 1 | 0.90       | 0.29       | 20.4   | 16.1   | 6.6    | 56.8   |
| Sample 2 | 0.89       | 0.29       | 22.1   | 17.6   | 7.3    | 54.0   |
| Sample 3 | 0.91       | 0.26       | 21.8   | 17.7   | 6.3    | 54.1   |
| Sample 4 | 0.90       | 0.28       | 22.4   | 18.1   | 6.9    | 52.5   |

**Table S3.** Values of charge density and depletion region width of the Cu(In,Ga)Se<sub>2</sub> devices that had different Ga gradients.

| Sample | Charge Density<br>( cm <sup>-3</sup> ) | Depletion region width<br>( $\mu$ m) |
|--------|----------------------------------------|--------------------------------------|
| A      | 3.42 $\times$ 10 <sup>16</sup>         | 0.264                                |
| B      | 5.53 $\times$ 10 <sup>15</sup>         | 0.544                                |
| C      | 2.12 $\times$ 10 <sup>16</sup>         | 0.358                                |
| D      | 4.88 $\times$ 10 <sup>16</sup>         | 0.280                                |

**Table S4.** Summary of the detailed amounts of starting materials dissolved in four precursor solutions that had different Ga ratios.

| No. | [Ga]/([In]+[Ga]) | Ga<br>(x mmol) | In <sub>2</sub> Se <sub>3</sub><br>((1.09-x)/2 mmol) | Cu <sub>2</sub> S<br>(mmol) | Se<br>(mmol) |
|-----|------------------|----------------|------------------------------------------------------|-----------------------------|--------------|
| I   | 10%              | <b>0.11</b>    | <b>0.49</b>                                          | 0.50                        | 2.20         |
| II  | 30%              | <b>0.33</b>    | <b>0.38</b>                                          | 0.50                        | 2.20         |
| III | 35%              | <b>0.38</b>    | <b>0.36</b>                                          | 0.50                        | 2.20         |
| IV  | 50%              | <b>0.56</b>    | <b>0.27</b>                                          | 0.50                        | 2.20         |

#### References

- 1 D. Zhao, Q. Fan, Q. Tian, Z. Zhou, Y. Meng, D. Kou, W. Zhou and S. Wu, *J. Mater. Chem. A*, 2016, **4**, 13476-13481.
- 2 Q. Tian, G. Wang, W. Zhao, Y. Chen, Y. Yang, L. Huang and D. Pan, *Chem. Mater.*, 2014, **26**, 3098-3103.
- 3 J. Fu, Q. Tian, Z. Zhou, D. Kou, Y. Meng, W. Zhou and S. Wu, *Chem. Mater.*, 2016, **28**, 5821-5828.
